# Supplementary material
Source: MDPI journal article supplement (https://www.mdpi.com/2073-4441/15/3/390)
Supplement: s1 [file s1]

Supplementary material of

## The Snowball Effect of Anthropogenic Alterations in A Karst Tropical Lake in Yucatán Peninsula, Environmental Variability and Risk Assessment

Sergio Cohuo, Antonia Moreno, Naydelin Escamilla, Alondra Mariel Pérez Tapia, Iván Santos Itzá, Laura A. Macario-Gonzalez, Carmen A. Villegas Sánchez, Alejandro Medina Quej

**Table S1.-** Physical, chemical and microbiological variables from Lake La Sabana during the dry and rainy season in Yucatán Peninsula

| Site | N       | W        | Climatic season | Tem p (°C) | Cond (µs/cm) | pH  | DO (mg/l) | Transp (m) | BOD <sub>5</sub> (mg/l) | TSS (mg/l) | Fecal coliforms | Total coliforms | ortofosfates (mg/l) | Nitrites (mg/l) | Nitritates (mg/l) | sulfates (g/l) | NSF WQI |
|------|---------|----------|-----------------|------------|--------------|-----|-----------|------------|-------------------------|------------|-----------------|-----------------|---------------------|-----------------|-------------------|----------------|---------|
| N1   | 18.5514 | -88.3134 | Dry season      | 26.4       | 577          | 7.9 | 8.75      | 0.25       | 25.4                    | 375        | 310             | 840             | 0.0031              | 0.0031          | 0.0121            | 2.441          | 56      |
| N2   | 18.5512 | -88.3132 |                 | 26.3       | 573          | 7.9 | 7.64      | 0.23       | 24.3                    | 467        | 18              | 1100            |                     |                 |                   |                | 56      |
| N3   | 18.5503 | -88.3124 |                 | 26.4       | 583          | 7.7 | 7.9       | 0.25       | 20                      | 570        | 18              | 1100            |                     |                 |                   |                | 56      |
| C1   | 18.5479 | -88.3120 |                 | 26.5       | 575          | 7.8 | 8.2       | 0.2        | 26.4                    | 420        | 1600            | 16000           | 0.1935              | 0.2437          | 0.301             | 1.405          | 55      |
| C2   | 18.5454 | -88.3148 |                 | 25.9       | 577          | 7.9 | 7.5       | 0.21       | 28.4                    | 550        | 620             | 3500            |                     |                 |                   |                | 52      |
| C3   | 18.5443 | -88.3144 |                 | 26.4       | 580          | 7.6 | 8.14      | 0.25       | 30.4                    | 530        | 940             | 16000           |                     |                 |                   |                | 54      |
| S1   | 18.5403 | -88.3189 |                 | 26.1       | 530          | 7.8 | 9.6       | 0.3        | 32.5                    | 560        | 1600            | 16000           | 0.2817              | 1.0241          | 0.6047            | 1.397          | 51      |
| S2   | 18.5400 | -88.3185 |                 | 26.3       | 560          | 7.8 | 10.6      | 0.28       | 40.2                    | 550        | 9200            | 16000           |                     |                 |                   |                | 48      |
| S3   | 18.5395 | -88.3180 |                 | 26.4       | 570          | 7.7 | 3.14      | 0.2        | 38.5                    | 480        | 3500            | 16000           |                     |                 |                   |                | 41      |
| W1   | 18.5322 | -88.3263 |                 | 25.9       | 520          | 7.5 | 8.12      | 0.35       | 20.5                    | 220        | 40              | 3500            |                     |                 |                   |                | 60      |
| W2   | 18.5298 | -88.3283 |                 | 25.8       | 550          | 7.5 | 7.4       | 0.45       | 18.3                    | 245        | 45              | 640             | 0.0043              | 0.0972          | 0.0013            | 3.523          | 60      |
| W3   | 18.5277 | -88.3333 |                 | 26.7       | 498          | 7.7 | 8.23      | 0.55       | 17.5                    | 350        | 92              | 1200            |                     |                 |                   |                | 60      |
| W4   | 18.5289 | -88.3331 |                 | 26.6       | 520          | 7.6 | 7.15      | 0.6        | 18.5                    | 210        | 260             | 1200            | 0.0028              | 0.0897          | 0.0021            | 2.908          | 60      |

|     |         |          |                 |      |     |     |       |      |      |     |        |        |        |        |        |       |    |
|-----|---------|----------|-----------------|------|-----|-----|-------|------|------|-----|--------|--------|--------|--------|--------|-------|----|
| W5  | 18.5287 | -88.3316 |                 | 26.6 | 560 | 7.7 | 6.85  | 0.55 | 20.5 | 190 | 210    | 230    |        |        |        |       | 59 |
| W6  | 18.5206 | -88.3448 |                 | 26.4 | 573 | 7.8 | 6.7   | 0.7  | 18.5 | 220 | 92     | 230    |        |        |        |       | 60 |
| NS1 |         |          | Rainy<br>season | 31.4 | 583 | 7.5 | 9.75  | 0.25 | 30   | 378 | 180    | 5400   | 0.0026 | 0.0025 | 0.0116 | 1.972 | 53 |
| NS2 |         |          |                 | 32.7 | 423 | 7.4 | 9.25  | 0.25 | 27   | 420 | 200    | 14000  |        |        |        |       | 53 |
| NS3 |         |          |                 | 35.6 | 446 | 7.5 | 10.9  | 0.25 | 32   | 390 | 180    | 9500   |        |        |        |       | 48 |
| CS1 |         |          |                 | 33.4 | 510 | 7.5 | 11.01 | 0.22 | 26   | 410 | 92000  | 160000 | 0.1720 | 0.216  | 0.420  | 1.235 | 47 |
| CS2 |         |          |                 | 34.7 | 443 | 7.6 | 9.85  | 0.24 | 33   | 420 | 28000  | 35000  |        |        |        |       | 52 |
| CS3 |         |          |                 | 35.4 | 518 | 7.6 | 10.21 | 0.25 | 36   | 380 | 160000 | 160000 |        |        |        |       | 47 |
| SS1 |         |          |                 | 32.8 | 565 | 7.4 | 10.87 | 0.2  | 40   | 385 | 24000  | 54000  | 0.1794 | 1.001  | 0.451  | 0.978 | 46 |
| SS2 |         |          |                 | 33.7 | 593 | 7.6 | 10.66 | 0.25 | 41   | 400 | 3300   | 7000   |        |        |        |       | 46 |
| SS3 |         |          |                 | 34.2 | 539 | 7.5 | 6.23  | 0.23 | 41   | 410 | 54000  | 92000  |        |        |        |       | 53 |
| W1  |         |          |                 | 34.4 | 480 | 7.5 | 9.83  | 0.45 | 23   | 210 | 92     | 2500   |        |        |        |       | 57 |
| W2  |         |          |                 | 35.5 | 521 | 7.5 | 7.69  | 0.48 | 23   | 200 | 95     | 750    | 0.0135 | 1.004  | 0.001  | 3.216 | 60 |
| W3  |         |          |                 | 35.2 | 475 | 7.4 | 8.23  | 0.43 | 25   | 180 | 150    | 2000   |        |        |        |       | 58 |
| W4  |         |          |                 | 34.6 | 485 | 7.4 | 7.46  | 0.5  | 25   | 195 | 210    | 550    | 0.0016 | 0.0451 | 0.001  | 2.147 | 60 |
| W5  |         |          |                 | 33.6 | 395 | 7.6 | 7.65  | 0.55 | 20   | 174 | 260    | 540    |        |        |        |       | 61 |
| W6  |         |          |                 | 35.6 | 476 | 7.6 | 8.2   | 0.5  | 18   | 95  | 150    | 640    |        |        |        |       | 60 |

Abbreviations are as follows: temperature (Temp), conductivity (Cond), dissolved oxygen (DO), transparency (Transp), five-day biochemical oxygen demand (BOD<sub>5</sub>), total suspended solids (TSS), and National Sanitation Foundations water quality index (NSF WQI).

**Table S2.** Table of pairwise Permutational Multivariate Analysis Of Variance (PERMANOVA) tests. For interaction terms (Lake sections  $\times$  season) pairwise tests are organized by levels of the corresponding factor as follows: (D) – Within level 'Dry' of factor Season, (R) – Within level 'Rainy' of factor Season, (W) – Within level 'Wetland' of factor Lake sections, (N) – Within level 'North' of factor Lake sections, (C) – Within level 'Center' of factor Lake sections, (S) – Within level 'South' of factor Lake sections. Bold values indicate significant results ( $p \leq 0.05$ ) after applying Benjamini-Hochberg correction to  $\alpha$ .

| Term Lake section                                                    |                 |          |               |              |               |               |
|----------------------------------------------------------------------|-----------------|----------|---------------|--------------|---------------|---------------|
|                                                                      | Groups          | <i>t</i> | <i>p</i> perm | Unique perms | <i>p</i> (MC) | $\alpha$ corr |
|                                                                      | north, wetland  | 3.988    | <b>0.001</b>  | 999          | <b>0.001</b>  | 0.008         |
|                                                                      | center, wetland | 4.633    | <b>0.001</b>  | 999          | <b>0.001</b>  | 0.017         |
|                                                                      | south, wetland  | 4.573    | <b>0.001</b>  | 999          | <b>0.001</b>  | 0.025         |
|                                                                      | north, center   | 1.883    | <b>0.026</b>  | 984          | 0.043         | 0.033         |
|                                                                      | north, south    | 1.687    | <b>0.017</b>  | 984          | 0.048         | 0.042         |
|                                                                      | center, south   | 1.364    | 0.119         | 987          | 0.137         | 0.050         |
| Term Season                                                          |                 |          |               |              |               |               |
|                                                                      | Groups          | <i>t</i> | <i>p</i> perm | Unique perms | <i>p</i> (MC) | $\alpha$ corr |
|                                                                      | dry, rainy      | 4.785    | <b>0.001</b>  | 999          | <b>0.001</b>  | 0.050         |
| Term Lake section $\times$ Season for pairs of levels of factor Zone |                 |          |               |              |               |               |
| Levels                                                               | Groups          | <i>t</i> | <i>p</i> perm | Unique perms | <i>p</i> (MC) | $\alpha$ corr |
| (D)                                                                  | center, wetland | 3.545    | 0.010         | 84           | <b>0.002</b>  | 0.008         |
|                                                                      | south, wetland  | 3.018    | 0.019         | 84           | <b>0.002</b>  | 0.013         |
|                                                                      | north, wetland  | 3.286    | <b>0.013</b>  | 84           | <b>0.003</b>  | 0.021         |
|                                                                      | north, south    | 1.253    | 0.177         | 10           | 0.257         | 0.042         |
|                                                                      | north, center   | 0.929    | 0.578         | 10           | 0.458         | 0.046         |

|                                                                 | center, south   | 0.793    | 0.805         | 10           | 0.549         | 0.050         |
|-----------------------------------------------------------------|-----------------|----------|---------------|--------------|---------------|---------------|
| (R)                                                             | center, wetland | 3.775    | 0.011         | 84           | <b>0.001</b>  | 0.004         |
|                                                                 | south, wetland  | 3.751    | 0.015         | 84           | <b>0.002</b>  | 0.017         |
|                                                                 | north, wetland  | 2.687    | 0.010         | 84           | <b>0.008</b>  | 0.025         |
|                                                                 | north, center   | 1.964    | 0.095         | 10           | 0.082         | 0.029         |
|                                                                 | center, south   | 1.561    | 0.199         | 10           | 0.119         | 0.033         |
|                                                                 | north, south    | 1.523    | 0.088         | 10           | 0.146         | 0.038         |
| Term Lake section × Season for pairs of levels of factor Season |                 |          |               |              |               |               |
| Levels                                                          | Groups          | <i>t</i> | <i>p</i> perm | Unique perms | <i>p</i> (MC) | $\alpha$ corr |
| (W)                                                             | dry, rainy      | 3.536    | <b>0.003</b>  | 414          | <b>0.001</b>  | 0.013         |
| (N)                                                             | dry, rainy      | 2.944    | 0.098         | 10           | <b>0.011</b>  | 0.025         |
| (C)                                                             | dry, rainy      | 2.795    | 0.107         | 10           | <b>0.018</b>  | 0.038         |
| (S)                                                             | dry, rainy      | 1.578    | 0.102         | 10           | 0.116         | 0.050         |
